# Supplementary material for: A novel in vitro tubular model to recapitulate features of distal airways: the bronchioid
Source: PubMed Central journal article supplement — Eur Respir J. 2024 Dec 5;64(6):2400562. doi: 10.1183/13993003.00562-2024 (PMC11627163; doi:10.1183/13993003.00562-2024), 2024-12-05

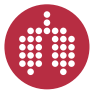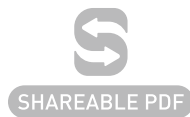

# A novel *in vitro* tubular model to recapitulate features of distal airways: the bronchioid

Elise Maurat, Katharina Raasch, Alexander M. Leipold, Pauline Henrot, Maeva Zysman, Renaud Prevel, Thomas Trian, Tobias Krammer, Vanessa Bergeron, Matthieu Thumerel , Pierre Nassoy, Patrick Berger , Antoine-Emmanuel Saliba, Laetitia Andrique, Gaëlle Recher and Isabelle Dupin 

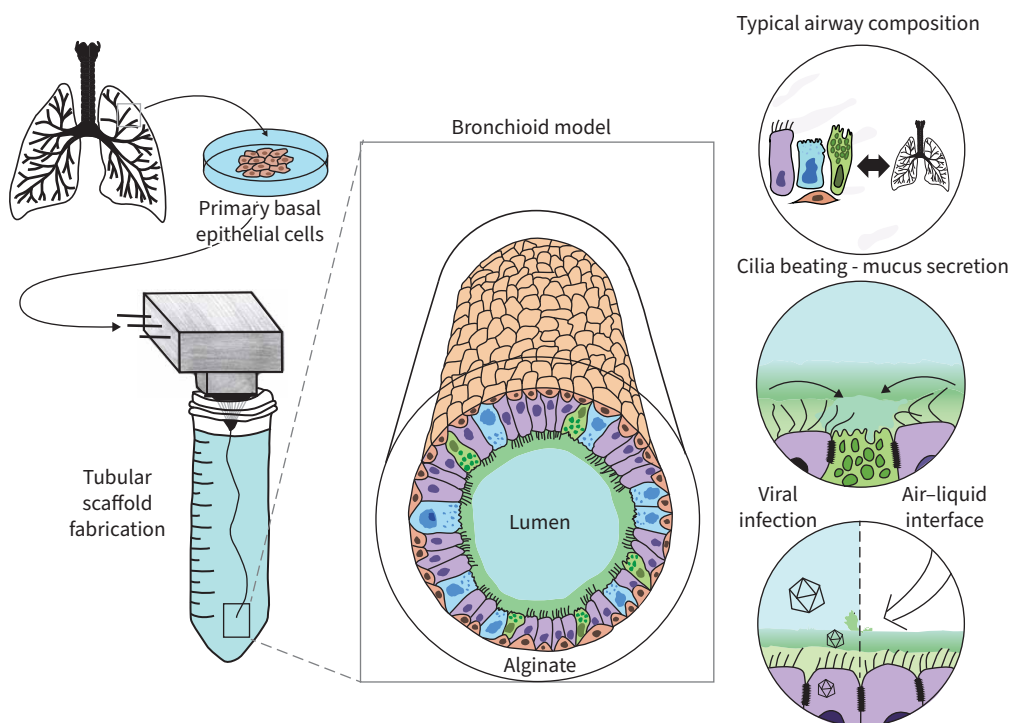

**GRAPHICAL ABSTRACT** Overview of the study: the bronchioid model.

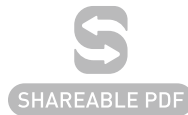

# A novel *in vitro* tubular model to recapitulate features of distal airways: the bronchioid

Elise Maurat<sup>1,2,9</sup>, Katharina Raasch<sup>1,2,9</sup>, Alexander M. Leipold<sup>3,7</sup>, Pauline Henrot<sup>1,2,4</sup>, Maeva Zysman<sup>1,2,4</sup>, Renaud Prevel<sup>1,2,4</sup>, Thomas Trian<sup>1,2</sup>, Tobias Krammer<sup>3</sup>, Vanessa Bergeron<sup>5</sup>, Matthieu Thumerel<sup>1,2,4</sup>, Pierre Nassoy<sup>6</sup>, Patrick Berger<sup>1,2,4</sup>, Antoine-Emmanuel Saliba<sup>3,7</sup>, Laetitia Andrique<sup>5</sup>, Gaëlle Recher<sup>6</sup> and Isabelle Dupin<sup>1,2,8</sup>

<sup>1</sup>Univ-Bordeaux, Centre de Recherche Cardio-thoracique de Bordeaux, U1045, CIC1401, Pessac, France. <sup>2</sup>INSERM, Centre de Recherche Cardio-thoracique de Bordeaux, U1045, CIC1401, Pessac, France. <sup>3</sup>Helmholtz Institute for RNA-based Infection Research (HIRI), Helmholtz-Center for Infection Research (HZI), Würzburg, Germany. <sup>4</sup>CHU de Bordeaux, Service d'exploration fonctionnelle respiratoire, Service de réanimation, Service de chirurgie thoracique, Bordeaux, France. <sup>5</sup>VoxCell Facility, TBMcore UAR CNRS 3427, INSERM US 005, Univ-Bordeaux, Bordeaux, France. <sup>6</sup>Laboratoire Photonique, Numérique et Nanosciences, UMR 5298 CNRS, Univ-Bordeaux, Bordeaux, France. <sup>7</sup>University of Würzburg, Faculty of Medicine, Institute of Molecular Infection Biology (IMIB), Würzburg, Germany. <sup>8</sup>Institut Universitaire de France (IUF), Paris, France. <sup>9</sup>Equal contribution as joint first authors.

Corresponding author: Isabelle Dupin ([isabelle.dupin@u-bordeaux.fr](mailto:isabelle.dupin@u-bordeaux.fr))

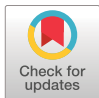

Shareable abstract (@ERSpublications)

A novel tubular engineered lung model called a “bronchioid” exhibits mucociliary function and is compatible with the establishment of an air-liquid interface <https://bit.ly/3LMdnkx>

**Cite this article as:** Maurat E, Raasch K, Leipold AM, *et al.* A novel *in vitro* tubular model to recapitulate features of distal airways: the bronchioid. *Eur Respir J* 2024; 64: 2400562 [DOI: 10.1183/13993003.00562-2024].

This extracted version can be shared freely online.

## Abstract

**Background** Airflow limitation is the hallmark of obstructive pulmonary diseases, with the distal airways representing a major site of obstruction. Although numerous *in vitro* models of bronchi already exist, there is currently no culture system for obstructive diseases that reproduces the architecture and function of small airways. Here, we aimed to engineer a model of distal airways to overcome the limitations of current culture systems.

**Methods** We developed a so-called bronchioid model by encapsulating human bronchial adult stem cells derived from clinical samples in a tubular scaffold made of alginate gel.

**Results** This template drives the spontaneous self-organisation of epithelial cells into a tubular structure. Fine control of the level of contraction is required to establish a model of the bronchiole, which has a physiologically relevant shape and size. Three-dimensional imaging, gene expression and single-cell RNA-sequencing analysis of bronchioids made of bronchial epithelial cells revealed tubular organisation, epithelial junction formation and differentiation into ciliated and goblet cells. Ciliary beating was observed, at a decreased frequency in bronchioids made of cells from COPD patients. The bronchioid could be infected by rhinovirus. An air-liquid interface was introduced that modulated gene expression.

**Conclusion** Here, we provide a proof of concept of a perfusable bronchioid with proper mucociliary and contractile functions. The key advantages of our approach, such as the air-liquid interface, lumen accessibility, recapitulation of pathological features and possible assessment of clinically relevant end-points, will make our pulmonary organoid-like model a powerful tool for preclinical studies.

Copyright ©The authors 2024.

This version is distributed under the terms of the Creative Commons Attribution Non-Commercial Licence 4.0. For commercial reproduction rights and permissions contact [permissions@ersnet.org](mailto:permissions@ersnet.org)

This article has an editorial commentary:  
<https://doi.org/10.1183/13993003.01531-2024>

Received: 9 May 2023  
Accepted: 21 July 2024

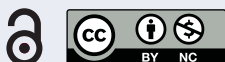

Supplement: ERJ-00562-2024.Shareable.pdf [file ERJ-00562-2024.Shareable.pdf]
